# Supplementary material for: MARCH2, a Novel Oncogene-regulated SNAIL E3 Ligase, Suppresses Triple-negative Breast Cancer Metastases
Source: PubMed Central journal article supplement (PMC10977041; doi:10.1158/2767-9764.crc-23-0090), 2024-03-28
Supplement: crc-23-0090-s01.pdf [file crc-23-0090-s01.pdf]

# Supplemental Figure 1

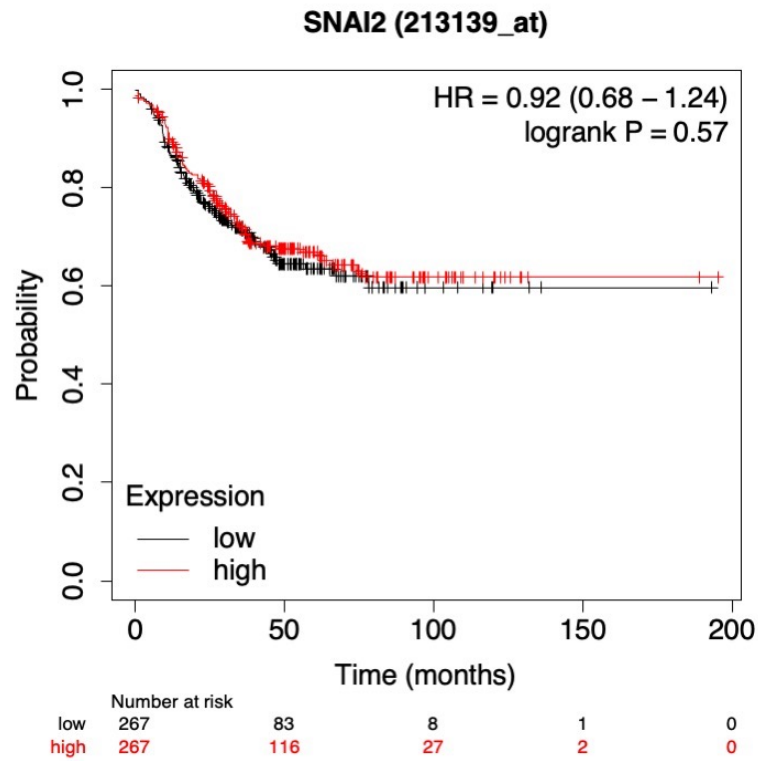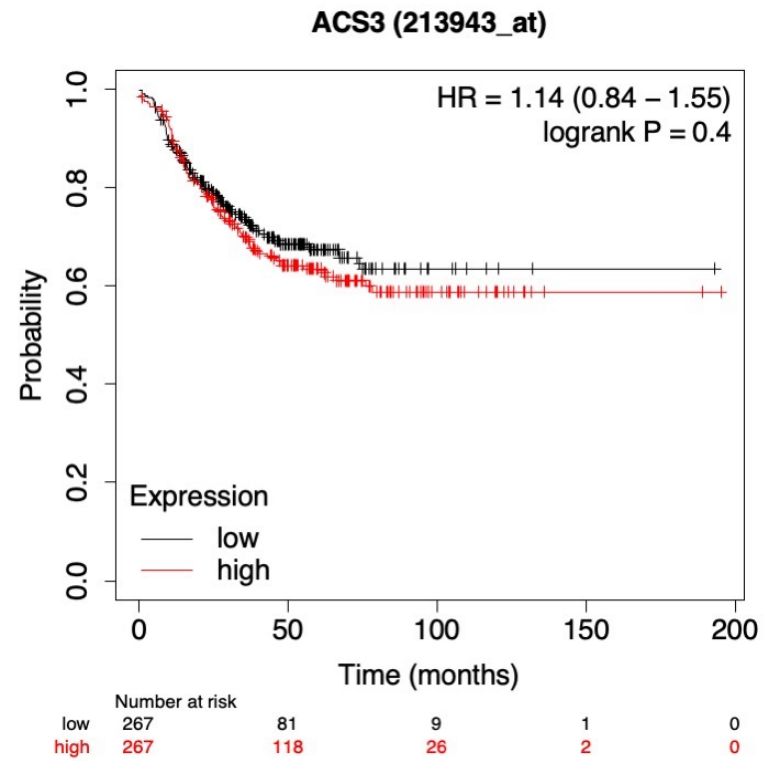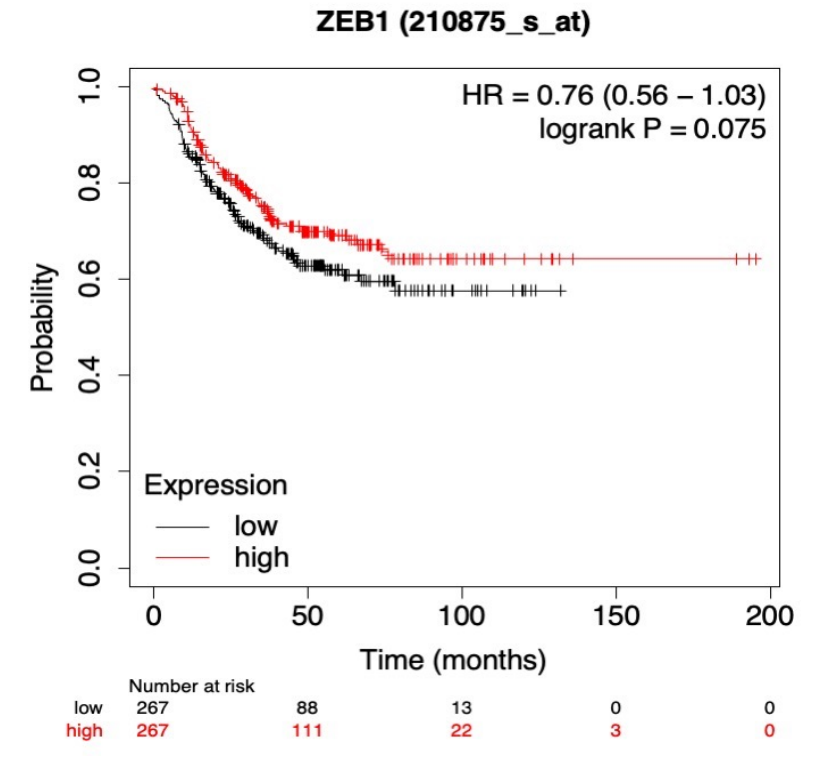

**Supplemental Figure 1.** Kaplan-Meier curves of EMT drivers in triple negative breast cancer. RNA expression levels of EMT drivers, Snail 2 (Slug), Twist and Zeb1, were divided across the median into high and low expressors, and survival curves were plotted.
