# Supplementary material for: MARCH2, a Novel Oncogene-regulated SNAIL E3 Ligase, Suppresses Triple-negative Breast Cancer Metastases
Source: PubMed Central journal article supplement (PMC10977041; doi:10.1158/2767-9764.crc-23-0090), 2024-03-28
Supplement: crc-23-0090-s04.pdf [file crc-23-0090-s04.pdf]

# Supplemental Fig 4

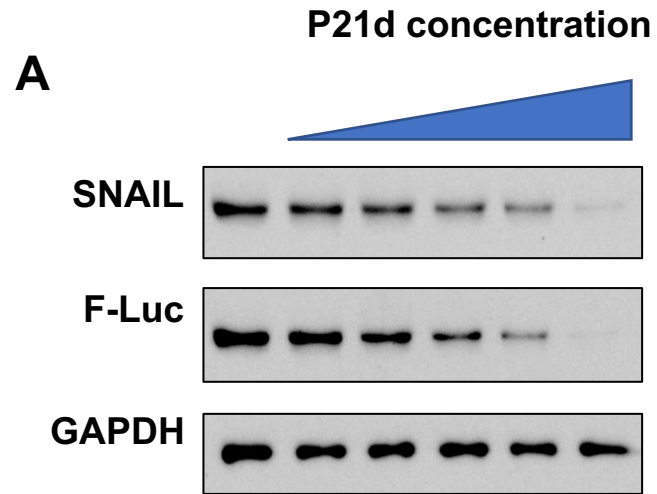

**B**

| Location | Gene name | Recovery    |
|----------|-----------|-------------|
| 5-3 #6   | MARCH2    | 3.790315732 |
| 2-6 #6   | FBXW8     | 2.332316654 |
| 4-8 #1   | RNF5      | 2.054217547 |
| 8-8 #9   | NHLRC1    | 2.052178248 |
| 2-3 #9   | FBXO18    | 1.820664834 |
| 2-8 #3   | FBXO2     | 1.745462311 |
| 3-8 #3   | RNF32     | 1.565603749 |
| 2-7 #2   | FBXO24    | 1.526517876 |
| 5-3 #2   | UBE4B     | 1.50392579  |
| 3-5 #1   | NEURL2    | 1.452411573 |
| 4-5 #5   | TRIM63    | 1.353733062 |
| 5-6 #1   | RNF112    | 1.297126112 |
| 8-1 #2   | MNAT1     | 1.29348143  |

**Supplemental Figure 4.** Screen for PTK6-dependent Snail E3 ligases using MDA-MB231 cells overexpressing Snail-F-Luc construct. A) PTK6 kinase inhibitor P21d treatment decreases expression of F-Luc SNAIL, similar to the effects on endogenous SNAIL. Western analysis was performed on lysates of P21d-treated cells using antibodies against SNAIL or F-Luciferase B) Candidate SNAIL E3 ligases identified by primary and secondary screening.
