# Supplementary material for: MARCH2, a Novel Oncogene-regulated SNAIL E3 Ligase, Suppresses Triple-negative Breast Cancer Metastases
Source: PubMed Central journal article supplement (PMC10977041; doi:10.1158/2767-9764.crc-23-0090), 2024-03-28
Supplement: crc-23-0090-s05.pdf [file crc-23-0090-s05.pdf]

## Supplemental Figure 5

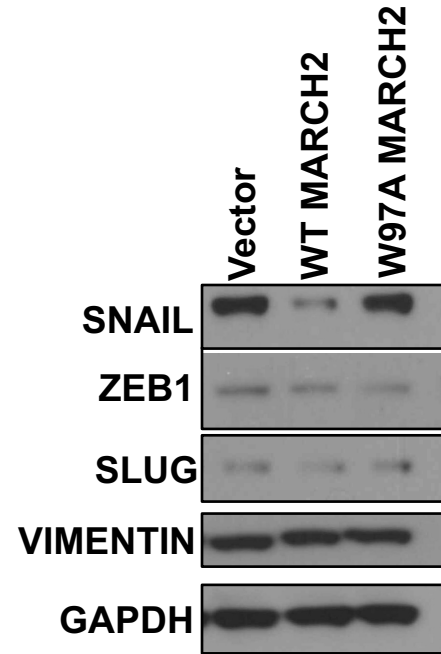

**Supplemental Figure 5.** MARCH2 does not affect expression of other epithelial-mesenchymal transition (EMT) drivers. Expression of SNAIL, ZEB1 and SLUG were determined in MDA-MB231 cells over-expressing wild type or RING domain mutant MARCH2.
