# Supplementary material for: MARCH2, a Novel Oncogene-regulated SNAIL E3 Ligase, Suppresses Triple-negative Breast Cancer Metastases
Source: PubMed Central journal article supplement (PMC10977041; doi:10.1158/2767-9764.crc-23-0090), 2024-03-28
Supplement: crc-23-0090-s06.pdf [file crc-23-0090-s06.pdf]

# Supplemental Figure 6

## TCGA

### Pancreatic cancer

MARCH2

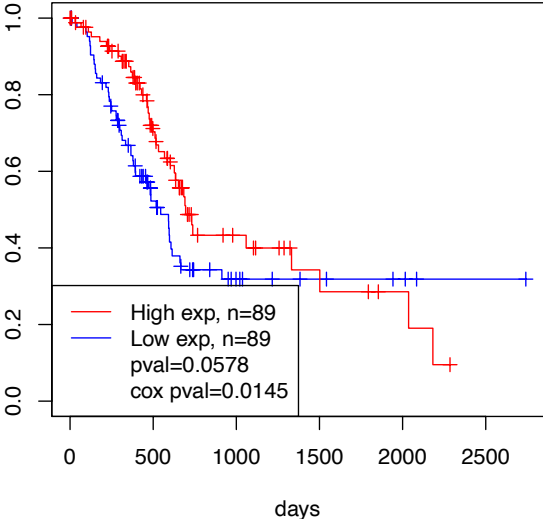

### Uterine cancer

MARCH2

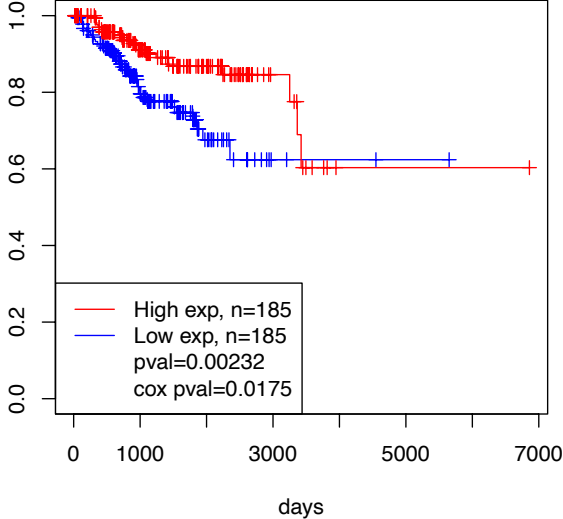

### Head and neck cancer

MARCH2

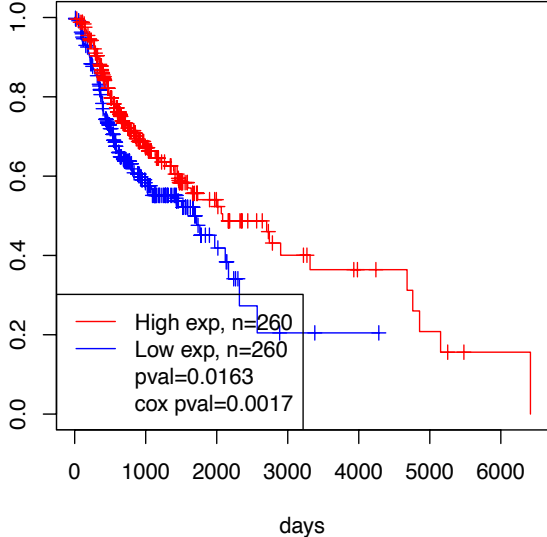

### Colorectal cancer

MARCH2

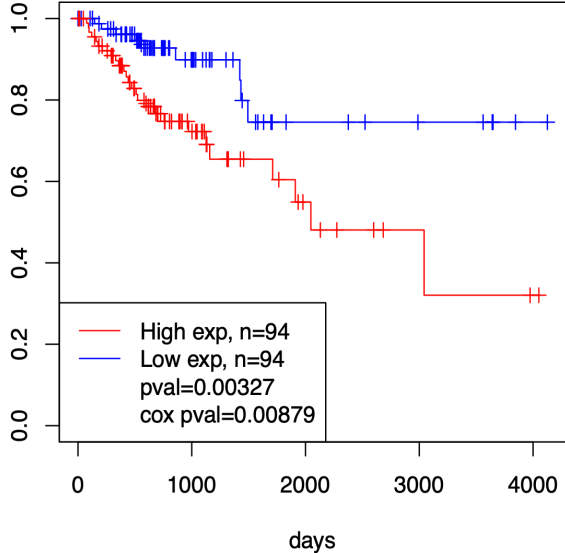

**Supplemental Figure 6.** Kaplan-Meier (KM) curves of MARCH2 expression in diverse cancer types using TCGA data set. Overall survival is plotted. Cancer samples were divided into high vs low expression groups based on whether their MARCH2 expression level was higher than upper quartile or lower than lower quartile.
