# Supplementary material for: MARCH2, a Novel Oncogene-regulated SNAIL E3 Ligase, Suppresses Triple-negative Breast Cancer Metastases
Source: PubMed Central journal article supplement (PMC10977041; doi:10.1158/2767-9764.crc-23-0090), 2024-03-28
Supplement: crc-23-0090-s07.pdf [file crc-23-0090-s07.pdf]

## Supplemental Figure 7

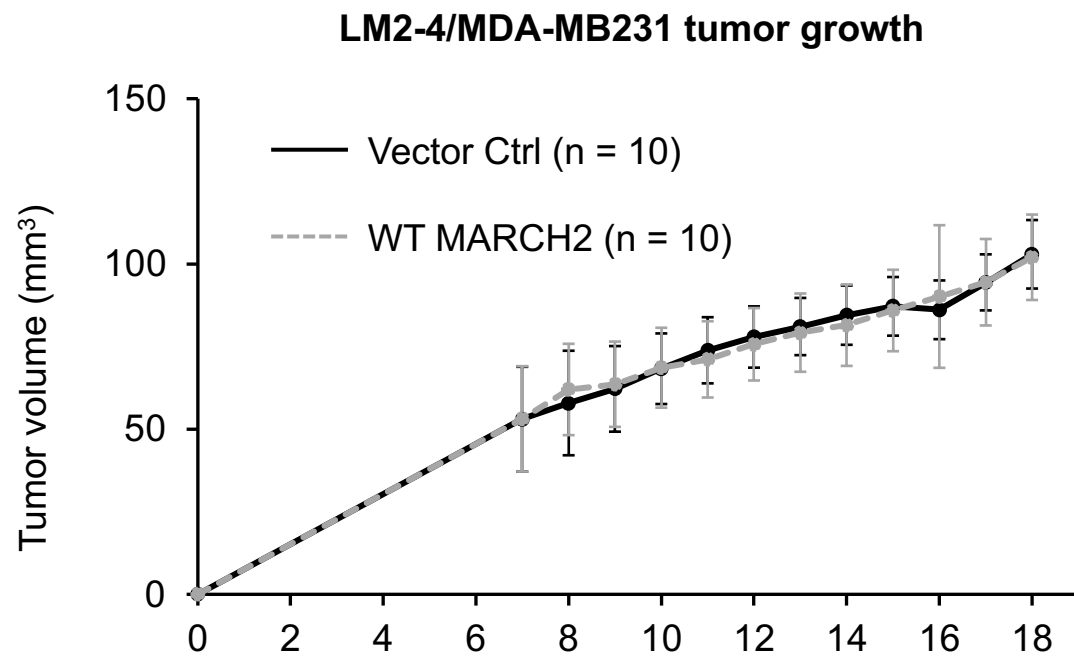

**Supplemental Figure 7.** Volumes of primary tumors formed following injection of MDA-MB231/LM2-4 Luciferase cells expressing vector control or wild-type MARCH2 into the 4<sup>th</sup> mammary fat pad implantation were measured on the indicated days. (n = 10 for vector control groups; n = 10 for wild-type MARCH2 groups).
