# Supplementary material for: MARCH2, a Novel Oncogene-regulated SNAIL E3 Ligase, Suppresses Triple-negative Breast Cancer Metastases
Source: PubMed Central journal article supplement (PMC10977041; doi:10.1158/2767-9764.crc-23-0090), 2024-03-28
Supplement: crc-23-0090-s08.pdf [file crc-23-0090-s08.pdf]

# Supplemental Figure 8

**A**

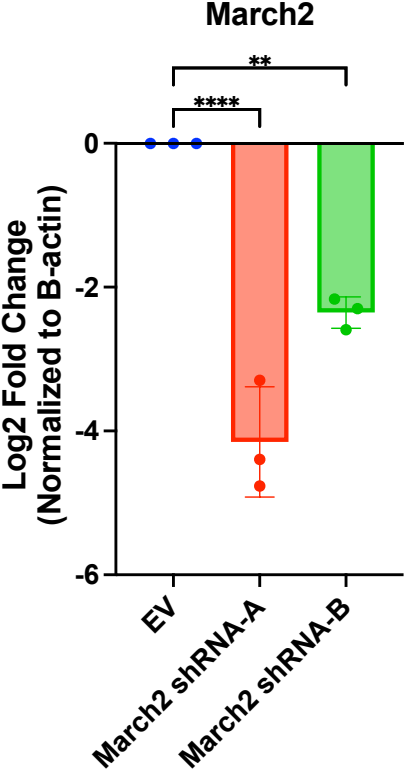

**B**

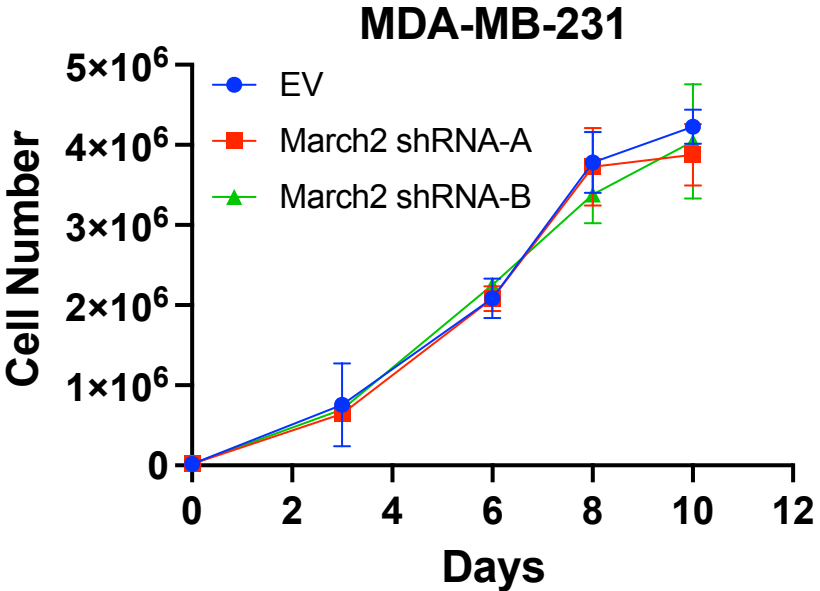

**Supplemental Figure 8.** MARCH2 shRNA does not affect growth of MDA-MB231 cells.

A) Two independent MARCH2 shRNA vectors that downregulate MARCH2 were identified. qRT-PCR data are shown. B) Growth curves of MDA-MB231 cells expressing empty vector control or MARCH2 shRNA vector are shown.
